# Supplementary material
Source: publisher figshare collection journal article supplement (https://gsapubs.figshare.com/ndownloader/files/31080232)
Supplement: Supplementary file 1 [file 31080232]

## Supplementary information for

# The Li isotopic composition of soil porewater responses to evapotranspiration

**Zhewen Xu<sup>1</sup>, Tao Li<sup>1</sup>, Gaojun Li<sup>1,2,3\*</sup>, David W. Hedding<sup>4</sup>, Yunqiang Wang<sup>5</sup>, Long-Fei Gou<sup>3</sup>, Liang Zhao<sup>1</sup>, Jun Chen<sup>1</sup>**

*<sup>1</sup>MOE Key Laboratory of Surficial Geochemistry, Department of Earth and Planetary Sciences, Nanjing University, Nanjing 210023, China*

*<sup>2</sup>Frontiers Science Center for Critical Earth Material Cycling, Nanjing University, Nanjing 210023, China*

*<sup>3</sup>State Key Laboratory of Oil and Gas Reservoir Geology and Exploitation, Chengdu University of Technology, Chengdu, Sichuan 610059, China*

*<sup>4</sup>Department of Geography, University of South Africa, Pioneer Avenue, Florida 1710, South Africa*

*<sup>5</sup>SKLLQG, Institute of Earth Environment, Chinese Academy of Sciences, Xi'an 710061, China*

## Model

The model simulates evolution of porewater  $\delta^7\text{Li}$  in response to evapotranspiration. According to the exponential decrease of evaporable water content in loess (Fig. 1B), a first order kinetics is used to calculate the changing volume of water ( $v$ ,  $\text{m}^3$ ) in soil:

$$\frac{dv}{dt} = -\varepsilon v \quad (\text{S1})$$

where  $t$  (s) is time and  $\varepsilon$  ( $\text{s}^{-1}$ ) is the rate constant of evaporation. Integration of Eq. (1) can give changes of water volume with an initial volume of  $v_0$ :

$$v = v_0 e^{-\varepsilon t} \quad (\text{S2})$$

The amount of  $^6\text{Li}$  in porewater, i.e.,  $cv$ , where  $c$  ( $\text{mol m}^{-3}$ ) is  $^6\text{Li}$  concentration, changes due to the dissolution of silicate minerals and uptake by clays:

$$\frac{dcv}{dt} = R \frac{v}{p} c_R - KFR \frac{v}{p} c \quad (\text{S3})$$

The first term on the right side of Eq. (S3) is the releasing rate of  $^6\text{Li}$  by silicate dissolution, and the second term is the uptake rate of  $^6\text{Li}$  by clays. The releasing rate of  $^6\text{Li}$  ( $\text{mol s}^{-1}$ ) is a product of the concentration of  $^6\text{Li}$  in silicate ( $c_R$ ,  $\text{mol m}^{-3}$ ) and silicate dissolution rate  $R \times v/p$  ( $\text{m}^3 \text{s}^{-1}$ ), where  $R$  is rate constant of silicate dissolution ( $\text{s}^{-1}$ ) that include possible changes in fraction of reactive surface area (grainsize) and surface-specific rate constant,  $p$  ( $\text{m}^3 \text{m}^{-3}$ ) is porosity, and  $v/p$  is the volume of minerals immersed in porewater. The uptake rate of  $^6\text{Li}$  is proportional to the concentration of  $^6\text{Li}$  in porewater, the partition coefficient of  $^6\text{Li}$  between fluid and clay ( $K$ , non-dimensional), and the rate of clay formation ( $F \times R \times v/p$ ), where  $F$  ( $\text{m}^3 \text{m}^{-3}$ ) is the fraction of clay formed by silicate dissolution.

Replacing  $v$  by Eq. (S2) enables integration of Eq. (S3), which result in the following analytical solution for the evolving porewater Li concentration with no initial concentration of Li:

$$c = \frac{c_R R_p \left[ 1 - e^{-(K_f R_p - \varepsilon)t} \right]}{K_f R_p - \varepsilon} \quad (\text{S4})$$

where  $R_p$  ( $R/p$ ,  $\text{s}^{-1}$ ) is the porosity normalized rate constant of silicate dissolution, and  $K_f$  ( $K \times F$ , non-dimensional) is water-clay  $^6\text{Li}$  partition coefficient normalized by fraction of clay formation by silicate dissolution.

The  $^6\text{Li}$  concentration of porewater in absence of clay Li uptake ( $c_{K=0}$ ) can be calculated from Eq. (S4) with  $K_f = 0$ :

$$c_{K=0} = \frac{c_R R_p (e^{\varepsilon t} - 1)}{\varepsilon} \quad (\text{S5})$$

Thus, dividing  $c$  by  $c_{K=0}$  from Eq. (S4) and Eq. (S5) would give the fraction of  $^6\text{Li}$  which remains in porewater:

$$f = \frac{\varepsilon c_R R_p \left[ 1 - e^{-(K_f R_p - \varepsilon)t} \right]}{c_R R_p (e^{\varepsilon t} - 1) (K_f R_p - \varepsilon)} \quad (\text{S6})$$

The  $^7\text{Li}/^6\text{Li}$  ratio of porewater ( $\gamma$ ) can be coupled to the evolution of  $^6\text{Li}$  concentration in Eq. (S3) to illustrate the evolution of  $^7\text{Li}$  concentration:

$$\frac{dcv\gamma}{dt} = R_p v c_R \gamma_R - K_f R_p v c \gamma \alpha \quad (\text{S7})$$

where  $\alpha$  is the isotopic fractionation between clay and fluid,  $\gamma_R$  is the  $^7\text{Li}/^6\text{Li}$  ratio of dissolving silicates.

It is convenient to convert the above equations by non-dimensional parameters of reaction time ( $T$ ), fluid  $^6\text{Li}$  concentration ( $C$ ), isotopic ratio ( $r$ ), water volume ( $V$ ), and normalized rate constant of evaporation ( $E$ ):

$$T = tK_fR_p \quad (\text{S8})$$

$$C = \frac{cK_f}{c_R} \quad (\text{S9})$$

$$r = \frac{\gamma}{\gamma_R} \quad (\text{S10})$$

$$V = \frac{v}{v_0} \quad (\text{S11})$$

$$E = \frac{\varepsilon}{K_fR_p} \quad (\text{S12})$$

where  $C_R$  is  $^6\text{Li}$  concentration of dissolving silicates. Thus, Eq. (S2), (S4), (S6) and (S7) can be converted to:

$$V = e^{-ET} \quad (\text{S13})$$

$$C = \frac{e^{(E-1)T}-1}{E-1} \quad (\text{S14})$$

$$f = \frac{[e^{(E-1)T}-1]E}{(E-1)(e^{ET}-1)} \quad (\text{S15})$$

$$\frac{dC V r}{dT} = V(1 - Cr\alpha) \quad (\text{S16})$$

By treating  $CVr$  as one single variable, Eq. (16) can be solved, which leads to the following expression for the normalized isotopic ratio ( $r$ ):

$$r = \frac{(E-1)[e^{(E-\alpha)T}-1]}{(E-\alpha)[e^{(E-1)T}-1]} \quad (\text{S17})$$

### **Samples, leaching experiment, and measurements**

Eolian loess deposited during the last glacial ( $L_1$  layer) with low degree of pedogenic alteration and during the last interglacial periods ( $S_1$  layer) with higher pedogenesis are sampled at five sites on the CLP. The sample of  $L_1$  layer taken from Caoxian site on the northwest of the CLP shows the least pedogenic alteration, and thus is used by leaching experiment to constrain the endmember composition associated with the weathering of evaporite, carbonate, and silicate.

About 0.5 g of loess was immersed in 50 ml Milli-Q water in a pre-cleaned polyethylene container for 30 min. The dissolved solution is then separated from the residue by centrifuging followed by filtering. The residual solid was treated by 50 ml of 3% high purity acetic acid for 48 h in a glass beaker, and was ultrasonically shaken for 20 min every 12 h in order to dissolve all calcite and dolomite in the loess sample. The dissolved solution is separated by centrifugation and filtration. The residual solid was washed by Milli-Q for three times to eliminate the interference of acetic acid, and was then treated by 0.01M HCl for 2 h to mimic the incipient weathering of silicate under field conditions. Results of the leaching experiment, which were used as the evaporite, carbonate and silicate weathering endmembers are shown in Table S1.

Samples of stream water were collected on the CLP during the summer monsoon season of 2019. At each site, ~1 liter of stream water was filtered using Teflon filtration units (0.22  $\mu\text{m}$ ) and stored in two 500 ml pre-cleaned Nalgene<sup>®</sup> bottles with one being acidified by 200  $\mu\text{l}$  concentrated  $\text{HNO}_3$ .

Major anions, cations and Li concentrations of the stream water and leaching solution were measured by ion chromatography, ICP-OES and quadrupole ICP-MS, respectively. For Li isotope measurements, samples containing ~50 ng Li were dried in a Teflon beaker before being treated with 200  $\mu$ l 7N HNO<sub>3</sub> and 200  $\mu$ l H<sub>2</sub>O<sub>2</sub> to remove dissolved organic matter. The residue was then re-dissolved in 4 ml 0.1 N distilled HCl and heated at 100 °C for at least 2 h. Li was separated from the matrix by a one-stage cation exchange column chemistry (AG50W X-12 resin) modified from a previous study Dellinger et al. (2015). Na/Li ratios of the column elution were monitored to ensure acceptable separation of Na and Li with <sup>23</sup>Na/<sup>7</sup>Li signal ratio measured on MC-ICP-MS below 10. The Li isotopic ratio of the purified samples was measured by a Neptune Plus MC-ICP-MS using the sample standard bracketing method. The Li isotopic ratio is reported in  $\delta^7\text{Li}$  relative to L-SVEC. Repeat analyses of the IAPSO seawater give  $\delta^7\text{Li}$  of  $30.73 \pm 0.14\text{‰}$  (mean  $\pm$  2 standard error, n = 14), which is close to recently published values of  $30.78 \pm 0.14\text{‰}$  and  $30.89 \pm 0.18\text{‰}$  (He et al., 2021; Zhang et al., 2021).

X-Ray diffraction (XRD) was used to qualitatively identify the clay mineral composition of the loess samples. The samples were first decarbonated by acetic acid of 1 mol/L, followed by sedimentation and centrifugation to separate the clay-sized particles. Air-dried slices were made for the XRD test using a Rigaku D/max-rA diffractometer with Cu-K $\alpha$  radiation. The scan range of the goniometer is 3° to 36° (2 $\theta$ ) with step length is 0.01°. Details on the XRD measurement and the 4 loess sections used in this study can be found in Zhao et al. (2005). The X-Ray diffractograms of the 8 samples are shown in Fig. 1C.

### **Endmember calculation**

Endmember calculation uses the concentration of NO<sub>3</sub><sup>-</sup>, Cl<sup>-</sup>, SO<sub>4</sub><sup>2-</sup>, Na<sup>+</sup>, Mg<sup>2+</sup> of stream water. It is assumed that NO<sub>3</sub><sup>-</sup> in stream water is solely derived from anthropogenic pollution

(e.g., agriculture input) with  $\text{Cl}^-/\text{Na}^+ = 4 \pm 1$ ,  $\text{NO}_3^-/\text{Na}^+ = 7 \pm 3$ , and  $\text{SO}_4^{2-}/\text{Na}^+ = 1$  according to Zhang et al. (2015). The ions contributed by anthropogenic pollution to the stream water can then be calculated by following equations:

$$[\text{NO}_3^-]_{anth} = [\text{NO}_3^-]_{stream} \quad (\text{S18})$$

$$[\text{Na}^+]_{anth} = [\text{NO}_3^-]_{anth} \times \left( \frac{[\text{Na}^+]}{[\text{NO}_3^-]} \right)_{anth} \quad (\text{S19})$$

$$[\text{Cl}^-]_{anth} = [\text{Na}^+]_{anth} \times \left( \frac{[\text{Cl}^-]}{[\text{Na}^+]} \right)_{anth} \quad (\text{S20})$$

$$[\text{SO}_4^{2-}]_{anth} = [\text{Na}^+]_{anth} \times \left( \frac{[\text{SO}_4^{2-}]}{[\text{Na}^+]} \right)_{anth} \quad (\text{S21})$$

The remaining  $\text{Cl}^-$  and  $\text{SO}_4^{2-}$  after anthropogenic correction are from rain and evaporite which can be solved by equations of two unknowns once the composition of rain and evaporite are fixed. The rain endmember is assumed to have the same composition as seawater ( $\text{Cl}^-/\text{Na}^+ = 1.17$ ,  $\text{SO}_4^{2-}/\text{Na}^+ = 0.06$ ) and the evaporite endmember is represented by the result of the loess leaching experiment ( $\text{Cl}^-/\text{Na}^+ = 0.32 \pm 0.02$ ,  $\text{SO}_4^{2-}/\text{Na}^+ = 0.35 \pm 0.02$ , 2 standard error of measurement error). These two endmembers have distinct  $\text{Cl}^-/\text{SO}_4^{2-}$  which allows accurate calculation of endmember mixing for the stream waters used in this study.

$$[\text{Cl}^-]_{stream} - [\text{Cl}^-]_{anth} = [\text{Cl}^-]_{rain} + [\text{Cl}^-]_{evap} \quad (\text{S22})$$

$$[\text{SO}_4^{2-}]_{stream} - [\text{SO}_4^{2-}]_{anth} = [\text{Cl}^-]_{rain} \times \left( \frac{[\text{SO}_4^{2-}]}{[\text{Cl}^-]} \right)_{rain} + [\text{Cl}^-]_{evap} \times \left( \frac{[\text{SO}_4^{2-}]}{[\text{Cl}^-]} \right)_{rain} \quad (\text{S23})$$

$[\text{Cl}^-]_{rain}$  and  $[\text{Cl}^-]_{evap}$  can be solved by Eqs. (S22) and (S23). Thus, the content of  $\text{Na}^+$  and  $\text{Mg}^{2+}$  in these two endmembers can be calculated according to the  $\text{Cl}^-/\text{Na}^+$  and  $\text{Mg}^{2+}/\text{Na}^+$  of the endmembers.

$$[\text{Na}^+]_{rain} = [\text{Cl}^-]_{rain} \times \left( \frac{[\text{Na}^+]}{[\text{Cl}^-]} \right)_{rain} \quad (\text{S24})$$

$$[\text{Na}^+]_{evap} = [\text{Cl}^-]_{evap} \times \left( \frac{[\text{Na}^+]}{[\text{Cl}^-]} \right)_{evap} \quad (\text{S25})$$

$$[\text{Mg}^{2+}]_{rain} = [\text{Na}^+]_{rain} \times \left( \frac{[\text{Mg}^{2+}]}{[\text{Na}^+]} \right)_{rain} \quad (\text{S26})$$

$$[\text{Mg}^{2+}]_{evap} = [\text{Na}^+]_{evap} \times \left( \frac{[\text{Mg}^{2+}]}{[\text{Na}^+]} \right)_{evap} \quad (\text{S27})$$

Carbonate dominants weathering source of Mg ions in stream water (Li and Li, 2014) while Na released from carbonate weathering can be quantified by the  $\text{Mg}^{2+}/\text{Na}^+$  of carbonate component of the loess leaching experiment. Thus,

$$[\text{Mg}^{2+}]_{carb} = [\text{Mg}^{2+}]_{stream} - [\text{Mg}^{2+}]_{rain} - [\text{Mg}^{2+}]_{evap} \quad (\text{S28})$$

$$[\text{Na}^+]_{carb} = [\text{Mg}^{2+}]_{carb} \times \left( \frac{[\text{Na}^+]}{[\text{Mg}^{2+}]} \right)_{carb} \quad (\text{S29})$$

This may overestimate the  $\text{Mg}^{2+}$  and  $\text{Na}^+$  from the carbonate contribution. However, since the final results of carbonate contribution to Li and Na budget are quite low (Fig. 3), this approximation won't influence our conclusion. After the correction of anthropogenic, rain, evaporite and carbonate input, the remaining  $\text{Na}^+$  is ascribed to contribution of silicate weathering.



$$[Na^+]_{sili} = [Na^+]_{stream} - [Na^+]_{anth} - [Na^+]_{rain} - [Na^+]_{evap} - [Na^+]_{carb} \quad (S30)$$

Na is a conservative element in stream water which can hardly be adsorbed or enter any secondary precipitates. Thus, the initial  $Li^+$  concentration of the stream water without any removing of Li into secondary precipitates can be given based on the Na contribution and Li/Na ratio of each endmember. Similarly, the initial  $\delta^7Li$  of stream water before any precipitation happens can be calculated based on the Li contribution and  $\delta^7Li$  of each endmember. The two equations are expressed as follows:

$$[Li^+]_{initial} = \sum_i \left[ [Na^+]_i \times \left( \frac{[Li^+]}{[Na^+]} \right)_i \right] \quad (S31)$$

$$\delta^7Li_{initial} = \frac{\sum_i \left[ [Na^+]_i \times \left( \frac{[Li^+]}{[Na^+]} \right)_i \times \delta^7Li_i \right]}{[Li^+]_{initial}} \quad (S32)$$

where  $i$  represents either of the 5 endmembers (anthropogenic pollution, rain, evaporite, carbonate and silicate). The result of Eq. (S31) can then be used to calculate the  $f$  value which represents the ratio of Li remains in stream water, and the result of Eq. (S32) can be used to constrain the apparent isotope fractionation:

$$f = \frac{[Li]_{stream}}{[Li]_{initial}} \quad (S33)$$

$$r = \frac{\delta^7Li_{stream}/1000+1}{\delta^7Li_{initial}/1000+1} \quad (S34)$$

## Monte Carlo simulations

Monte Carlo simulation is applied to estimate the propagated errors in the calculation. In each simulation, the input values, such as the endmember ion ratios and lithium isotopic ratios, are randomly shifted by a value following a Gaussian distribution with given standard deviation  $\sigma$ . For measurement of a single sample representing an endmember (e.g., leaching experiment of Caoxian loess for evaporite, carbonate and silicate),  $\sigma$  stands for the measurement error (2SD=5% for ion content and 2SD=0.52‰ for lithium isotopes). For average results of several samples representing an endmember (e.g., evaporite of Yellow River),  $\sigma$  stands for the standard deviation of those samples. As the calculated results change in every simulation, the whole algorithm was repeated for 100 times to get average value and the propagated standard deviation of the results. The detailed endmember values and their standard deviations are shown in Table S1.

## REFERENCES CITED

- Dellinger, M., Gaillardet, J., Bouchez, J., Calmels, D., Louvat, P., Dosseto, A., Gorge, C., Alanoca, L., and Maurice, L., 2015, Riverine Li isotope fractionation in the Amazon River basin controlled by the weathering regimes: *Geochimica et Cosmochimica Acta*, v. 164, p. 71-93.
- Gou, L.-F., Jin, Z., Pogge von Strandmann, P. A. E., Li, G., Qu, Y.-X., Xiao, J., Deng, L., and Galy, A., 2019, Li isotopes in the middle Yellow River: Seasonal variability, sources and fractionation: *Geochimica et Cosmochimica Acta*, v. 248, p. 88-108.

- He, M. Y., Dong, J. B., Jin, Z., Liu, C. Y., and Deng, L., 2021, Pedogenic processes in loess-paleosol sediments: Clues from Li isotopes of leachate in Luochuan loess: *Geochimica et Cosmochimica Acta*, v. 299, no. 15A.
- Li, T., and Li, G., 2014, Incorporation of trace metals into microcodium as novel proxies for paleo-precipitation: *Earth & Planetary Science Letters*, v. 386, no. 1, p. 34-40.
- Turner, D. R., Whitfield, M., and Dickson, A., 1981, The equilibrium speciation of dissolved components in freshwater and sea water at 25°C and 1 atm pressure: *Geochimica et Cosmochimica Acta*, v. 45, p. 855-881.
- Zhang, Q., Jin, Z., Zhang, F., and Xiao, J., 2015, Seasonal variation in river water chemistry of the middle reaches of the Yellow River and its controlling factors: *Journal of Geochemical Exploration*, v. 156, p. 101-113.
- Zhang, X., Saldi, G. D., Schott, J., Bouchez, J., Kuessner, M., Montouillout, V., Henahan, M., and Gaillardet, J., 2021, Experimental constraints on Li isotope fractionation during the interaction between kaolinite and seawater: *Geochimica et Cosmochimica Acta*, v. 292, p. 333-347.
- Zhao, L., Ji, J., Chen, J., Liu, L., Chen, Y., and William, B., 2005, Variations of illite/chlorite ratio in Chinese loess sections during the last glacial and interglacial cycle: Implications for monsoon reconstruction: *Geophysical Research Letters*, v. 32, no. 20, p. L20718.

## TABLES

Table S1. Endmember values and their standard deviations (2SD) used in the endmember mixing model

| Endmember     | Mg/Na        | Cl/Na      | NO <sub>3</sub> /Na | SO <sub>4</sub> /Na | 1000*Li/Na  | δ <sup>7</sup> Li/‰ | Data Source                              |                     |
|---------------|--------------|------------|---------------------|---------------------|-------------|---------------------|------------------------------------------|---------------------|
| Rain          | 0.112        | 1.17       | 0                   | 0.06                | 0.054       | 9.3±0.5             | Gou et al., 2019;<br>Turner et al., 1981 |                     |
| Anthropogenic | 0            | 4±1        | 7±3                 | 1                   | 0.014+0.001 | 23.8±0.5            | Gou et al., 2019;<br>Zhang et al., 2015  |                     |
| Evaporite     | CLP          | 0.05±0.004 | 0.32±0.02           | 0                   | 0.35±0.02   | 0.103±0.007         | 14.8±0.5                                 | leaching experiment |
|               | Yellow River | 0          | 0.77±0.15           | 0                   | 0.64±0.15   | 0.252±0.14          | 23.6±4.8                                 | Gou et al., 2019    |
| Carbonate     | 25.6±1.8     | 0          | 0                   | 0                   | 19.32±1.41  | 4.4±0.5             | leaching experiment                      |                     |
| Silicate      | 7.1±0.5      | 0          | 0                   | 0                   | 52.95±3.74  | 1.4±0.5             | leaching experiment                      |                     |

Table S2. Sample information and testing results of all the sampling sites in this study

| Sample Name | Latitude/°N | Longitude/°E | Concentration (umol/L) |     |      |      |    |    |     |                 |                 |      | δ <sup>7</sup> Li | 2SE  |
|-------------|-------------|--------------|------------------------|-----|------|------|----|----|-----|-----------------|-----------------|------|-------------------|------|
|             |             |              | Ca                     | K   | Mg   | Na   | Sr | F  | Cl  | NO <sub>3</sub> | SO <sub>4</sub> | Li   |                   |      |
| 20190807-1  | 34.836140   | 111.155696   | 924                    | 50  | 1403 | 2502 | 12 | 12 | 55  | 0               | 7               | 2.30 | 23.10             | 0.14 |
| 20190807-3  | 35.937766   | 110.756548   | 3047                   | 271 | 1728 | 4659 | 14 | 5  | 419 | 17              | 108             | 3.73 | 17.05             | 0.53 |
| 20190808-1  | 36.121007   | 110.688269   | 1138                   | 117 | 626  | 1267 | 6  | 9  | 76  | 2               | 17              | 1.62 | 23.13             | 0.05 |
| 20190808-3  | 36.080030   | 110.230421   | 1292                   | 130 | 895  | 1418 | 7  | 11 | 72  | 2               | 7               | 1.60 | 27.59             | 0.04 |
| 20190808-4  | 36.045072   | 110.143154   | 1097                   | 57  | 1102 | 1541 | 8  | 14 | 32  | 1               | 10              | 1.90 | 22.11             | 0.17 |
| 20190808-5  | 36.023364   | 110.147966   | 1262                   | 35  | 769  | 756  | 6  | 11 | 52  | 3               | 10              | 1.13 | 22.84             | 0.15 |
| 20190808-6  | 35.710569   | 109.424710   | 1348                   | 68  | 950  | 1696 | 8  | 7  | 745 | 6               | 103             | 2.08 | 20.29             | 0.44 |
| 20190809-1  | 36.622006   | 109.419401   | 883                    | 67  | 1041 | 2465 | 9  | 7  | 229 | 3               | 60              | 2.67 | 22.66             | 0.05 |
| 20190809-2  | 36.694322   | 109.422173   | 1009                   | 90  | 1336 | 4611 | 11 | 9  | 231 | 3               | 61              | 2.76 | 22.91             | 0.19 |
| 20190809-3  | 36.791824   | 109.890846   | 1339                   | 63  | 863  | 1814 | 10 | 9  | 209 | 2               | 34              | 3.41 | 15.04             | 0.55 |

|            |           |            |       |     |       |        |     |    |       |     |      |       |       |      |
|------------|-----------|------------|-------|-----|-------|--------|-----|----|-------|-----|------|-------|-------|------|
| 20190809-4 | 36.846407 | 110.009821 | 1237  | 81  | 1168  | 2773   | 11  | 7  | 254   | 2   | 38   | 3.09  | 15.77 | 0.64 |
| 20190809-6 | 36.927438 | 110.175012 | 1011  | 115 | 1160  | 4061   | 11  | 11 | 277   | 4   | 39   | 3.02  | 23.54 | 0.05 |
| 20190809-7 | 37.187493 | 110.129156 | 833   | 85  | 1603  | 4946   | 11  | 8  | 139   | 2   | 58   | 2.84  | 21.85 | 0.20 |
| 20190809-8 | 37.419463 | 110.144037 | 1196  | 83  | 2366  | 5689   | 18  | 6  | 530   | 3   | 104  | 3.50  | 21.04 | 0.10 |
| 20190809-9 | 37.508907 | 110.220537 | 988   | 61  | 1185  | 4013   | 11  | 9  | 308   | 1   | 55   | 2.73  | 21.06 | 0.37 |
| 20190810-4 | 38.041787 | 109.363503 | 1301  | 53  | 1071  | 3516   | 10  | 9  | 104   | 1   | 74   | 1.42  | 28.50 | 0.04 |
| 20190810-5 | 37.835355 | 109.223078 | 835   | 66  | 1785  | 6129   | 14  | 7  | 244   | 1   | 76   | 2.38  | 26.11 | 0.49 |
| 20190811-3 | 36.864132 | 107.237387 | 19267 | 382 | 30430 | 143932 | 339 | 4  | 20235 | 51  | 1030 | 37.42 | 18.62 | 0.16 |
| 20190811-4 | 36.775609 | 107.179976 | 7962  | 314 | 28908 | 61462  | 179 | 25 | 8373  | 105 | 1066 | 7.64  | 22.41 | 0.16 |
| 20190811-5 | 36.714926 | 107.185894 | 5831  | 217 | 23353 | 44802  | 170 | 20 | 6203  | 52  | 907  | 7.07  | 27.57 | 0.05 |
| 20190811-6 | 36.641002 | 107.221692 | 2667  | 129 | 6937  | 12310  | 53  | 10 | 1773  | 15  | 277  | 5.25  | 22.33 | 0.11 |
| 20190811-7 | 36.578984 | 107.277533 | 1710  | 131 | 6879  | 15028  | 60  | 12 | 1855  | 6   | 356  | 6.25  | 23.23 | 0.14 |
| 20190811-8 | 36.441128 | 107.441810 | 1074  | 75  | 4978  | 11253  | 35  | 8  | 1366  | 6   | 218  | 5.29  | 27.31 | 0.14 |
| 20190811-9 | 36.235776 | 107.606541 | 3281  | 198 | 9578  | 22431  | 74  | 15 | 2863  | 26  | 443  | 6.39  | 22.41 | 0.06 |
| 20190812-1 | 35.768010 | 107.789424 | 757   | 93  | 1340  | 3709   | 11  | 10 | 178   | 1   | 32   | 3.96  | 21.33 | 0.13 |
| 20190812-2 | 35.680876 | 107.502420 | 1080  | 55  | 2125  | 5294   | 24  | 8  | 428   | 3   | 108  | 4.89  | 23.75 | 0.10 |
| 20190812-3 | 35.722346 | 107.349337 | 383   | 36  | 514   | 1964   | 4   | 16 | 58    | 0   | 28   | 2.60  | 22.11 | 0.05 |
| 20190812-4 | 35.710092 | 107.143584 | 679   | 131 | 1902  | 7234   | 19  | 7  | 558   | 0   | 129  | 4.74  | 21.40 | 0.40 |
| 20190812-5 | 35.674309 | 107.092054 | 687   | 50  | 2177  | 6003   | 23  | 6  | 268   | 0   | 89   | 3.79  | 24.15 | 0.14 |
| 20190812-6 | 35.619019 | 106.889413 | 250   | 24  | 841   | 3425   | 6   | 6  | 60    | 0   | 21   | 2.84  | 21.78 | 0.07 |
| 20190812-7 | 35.485906 | 106.913291 | 366   | 71  | 1282  | 5067   | 8   | 9  | 128   | 0   | 61   | 3.73  | 26.72 | 0.04 |
| 20190812-8 | 35.488584 | 106.883880 | 310   | 51  | 1673  | 4598   | 9   | 7  | 139   | 1   | 58   | 3.74  | 25.84 | 0.05 |
| 20190812-9 | 35.499771 | 106.841050 | 1316  | 75  | 1129  | 1401   | 19  | 7  | 56    | 3   | 44   | 1.20  | 25.53 | 0.04 |
| 20190813-4 | 35.154415 | 106.794178 | 1373  | 31  | 904   | 822    | 7   | 12 | 18    | 1   | 13   | 1.07  | 22.41 | 0.04 |
| 20190813-5 | 35.124701 | 106.790524 | 1397  | 64  | 899   | 567    | 6   | 10 | 24    | 3   | 17   | 1.47  | 19.37 | 0.09 |
| 20190813-6 | 35.124701 | 106.790524 | 1798  | 24  | 786   | 385    | 6   | 12 | 18    | 0   | 6    | 1.30  | 18.70 | 0.58 |
| 20190813-7 | 35.022014 | 106.781489 | 1315  | 42  | 973   | 358    | 4   | 14 | 32    | 1   | 8    | 1.15  | 17.05 | 0.10 |
| 20190813-8 | 34.974321 | 106.779637 | 1066  | 50  | 1023  | 653    | 6   | 10 | 19    | 2   | 13   | 1.73  | 17.82 | 0.41 |
| 20190813-9 | 34.887404 | 106.837948 | 934   | 53  | 416   | 367    | 4   | 13 | 30    | 3   | 15   | 0.49  | 21.74 | 0.50 |

|            |           |            |      |     |      |      |    |    |     |    |     |      |       |      |
|------------|-----------|------------|------|-----|------|------|----|----|-----|----|-----|------|-------|------|
| 20190814-1 | 34.378676 | 107.049914 | 1266 | 108 | 1000 | 2593 | 9  | 4  | 15  | 3  | 11  | 2.09 | 22.31 | 0.05 |
| 20190814-4 | 34.309371 | 108.099221 | 1365 | 164 | 1147 | 3082 | 7  | 11 | 18  | 8  | 11  | 2.63 | 22.34 | 0.04 |
| 20190814-5 | 34.338256 | 108.109578 | 2047 | 64  | 1695 | 2921 | 11 | 9  | 176 | 5  | 26  | 2.50 | 20.55 | 0.51 |
| 20190814-6 | 34.337634 | 108.115576 | 893  | 77  | 1290 | 2972 | 9  | 6  | 253 | 15 | 41  | 2.63 | 23.26 | 0.12 |
| 20190815-1 | 35.545473 | 109.300906 | 933  | 176 | 1886 | 8378 | 14 | 6  | 635 | 1  | 139 | 4.10 | 23.19 | 0.04 |
| 20190815-2 | 34.547079 | 109.305005 | 1099 | 128 | 968  | 3758 | 10 | 6  | 268 | 5  | 57  | 2.44 | 19.54 | 0.36 |
| 20190815-3 | 34.424047 | 109.519657 | 973  | 31  | 488  | 690  | 4  | 3  | 24  | 6  | 12  | 0.80 | 22.05 | 0.19 |
| 20190815-4 | 34.610877 | 110.283662 | 1247 | 94  | 1000 | 2924 | 10 | 8  | 223 | 4  | 50  | 2.22 | 18.40 | 0.14 |
